# Supplementary material for: Design, synthesis and antitumor activity of Ascaphin-8 derived stapled peptides based on halogen–sulfhydryl click chemical reactions
Source: Royal Society of Chemistry journal article supplement (doi:10.1039/d3ra02743k), 2023-01-01
Supplement: d3ra02743k1.pdf [file d3ra02743k1.pdf]

## Supplementary Material

### HPLC and MS spectra of compounds

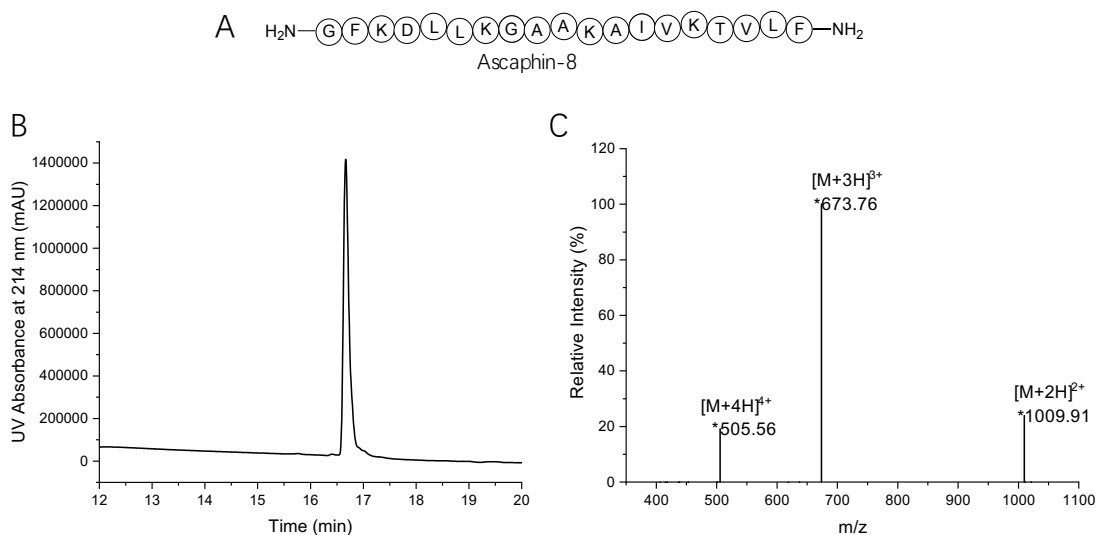

Supplementary Figure 1. A) The structure Ascaphin-8; B) The HPLC of purified Ascaphin-8; C) MS spectrum of Ascaphin-8 calculated for  $C_{97}H_{164}N_{24}O_{22}$  2017.25; found  $[M+2H]^{2+}$ : 1009.91;  $[M+3H]^{3+}$ : 673.76;  $[M+4H]^{4+}$ : 505.56.

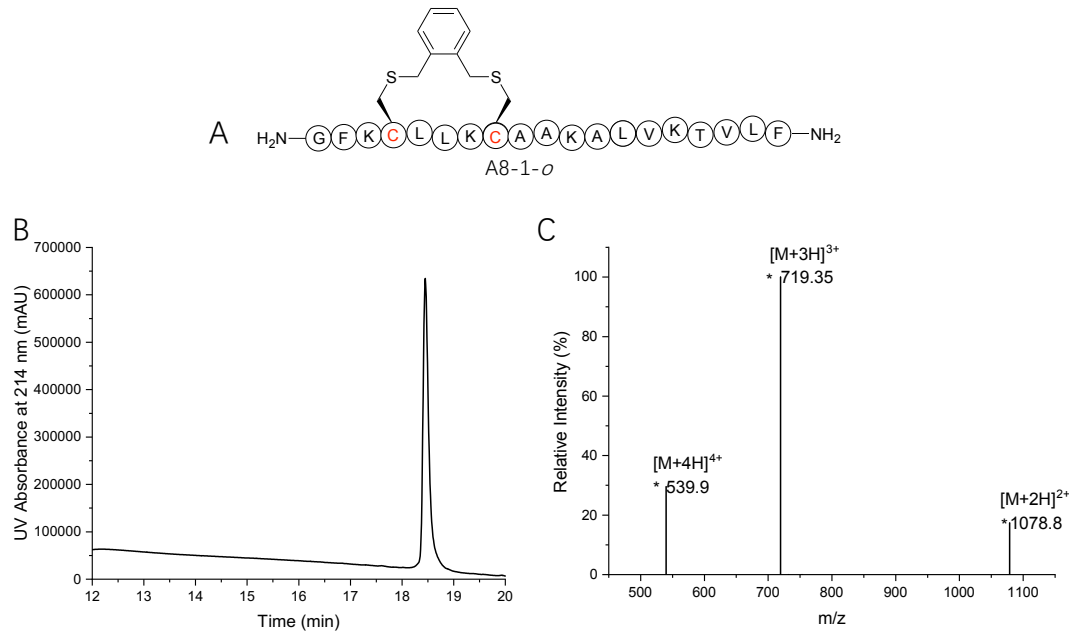

Supplementary Figure 2. A) The structure A8-1-o; B) The HPLC of purified A8-1-o; C) MS spectrum of A8-1-o calculated for  $C_{105}H_{172}N_{24}O_{20}S_2$  2153.26; found  $[M+2H]^{2+}$ : 1078.8;  $[M+3H]^{3+}$ : 719.35;  $[M+4H]^{4+}$ : 539.9.

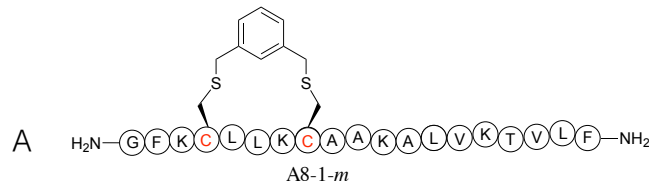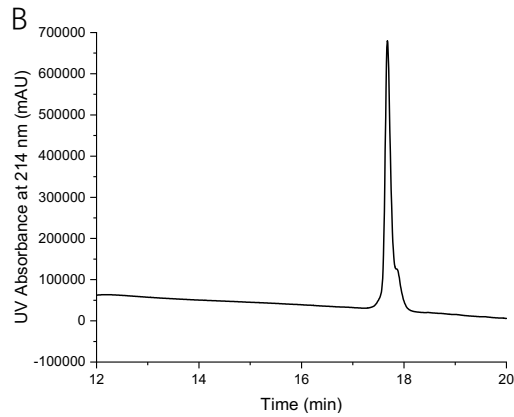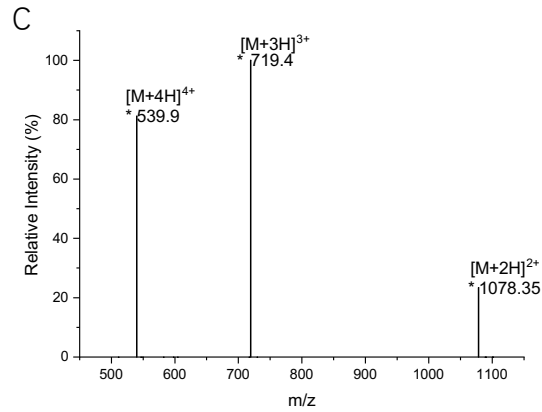

Supplementary Figure 3. A) The structure A8-1-*m*; B) The HPLC of purified A8-1-*m*; C) MS spectrum of A8-1-*m* calculated for  $C_{105}H_{172}N_{24}O_{20}S_2$  2153.26; found  $[M+2H]^{2+}$ : 1078.35;  $[M+3H]^{3+}$ : 719.4;  $[M+4H]^{4+}$ : 539.9.

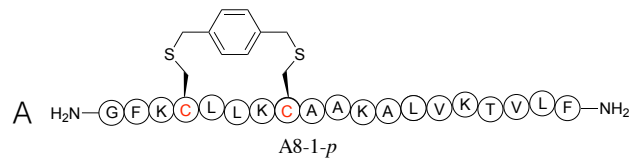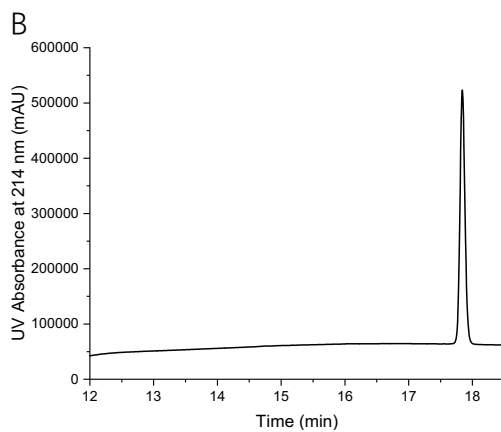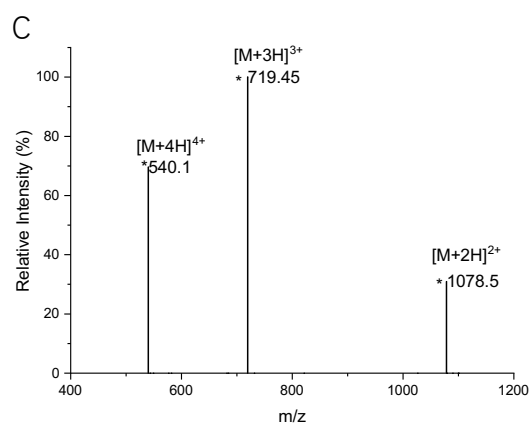

Supplementary Figure 4. A) The structure A8-1-*p*; B) The HPLC of purified A8-1-*p*; C) MS spectrum of A8-1-*p* calculated for  $C_{105}H_{172}N_{24}O_{20}S_2$  2153.26; found  $[M+2H]^{2+}$ : 1078.5;  $[M+3H]^{3+}$ : 719.45;  $[M+4H]^{4+}$ : 540.1.

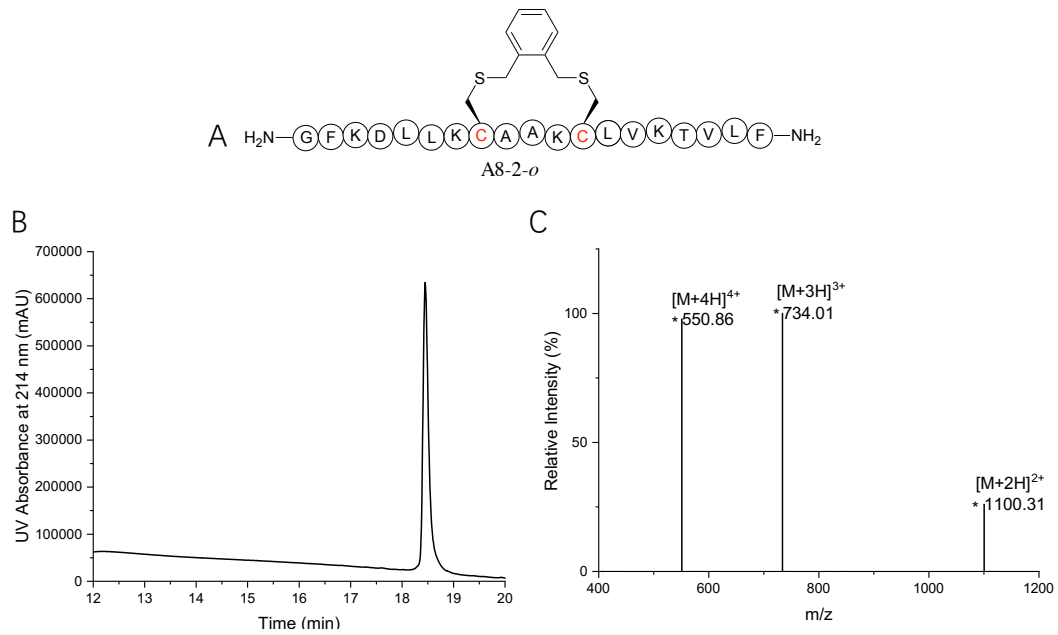

Supplementary Figure 5. A) The structure A8-2-o; B) The HPLC of purified A8-2-o; C) MS spectrum of A8-2-o calculated for  $C_{106}H_{172}N_{24}O_{22}S_2$  2197.24; found  $[M+2H]^{2+}$ : 1100.31;  $[M+3H]^{3+}$ : 734.01;  $[M+4H]^{4+}$ : 550.86.

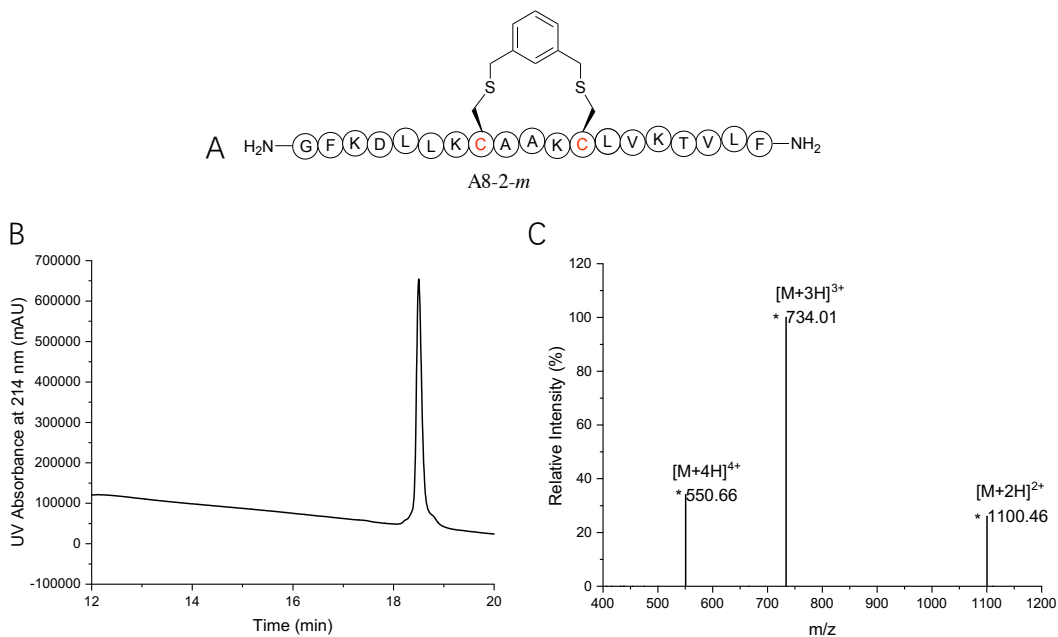

Supplementary Figure 6. A) The structure A8-2-m; B) The HPLC of purified A8-2-m; C) MS spectrum of A8-2-m calculated for  $C_{106}H_{172}N_{24}O_{22}S_2$  2197.24; found  $[M+2H]^{2+}$ : 1100.46;  $[M+3H]^{3+}$ : 734.01;  $[M+4H]^{4+}$ : 550.66.

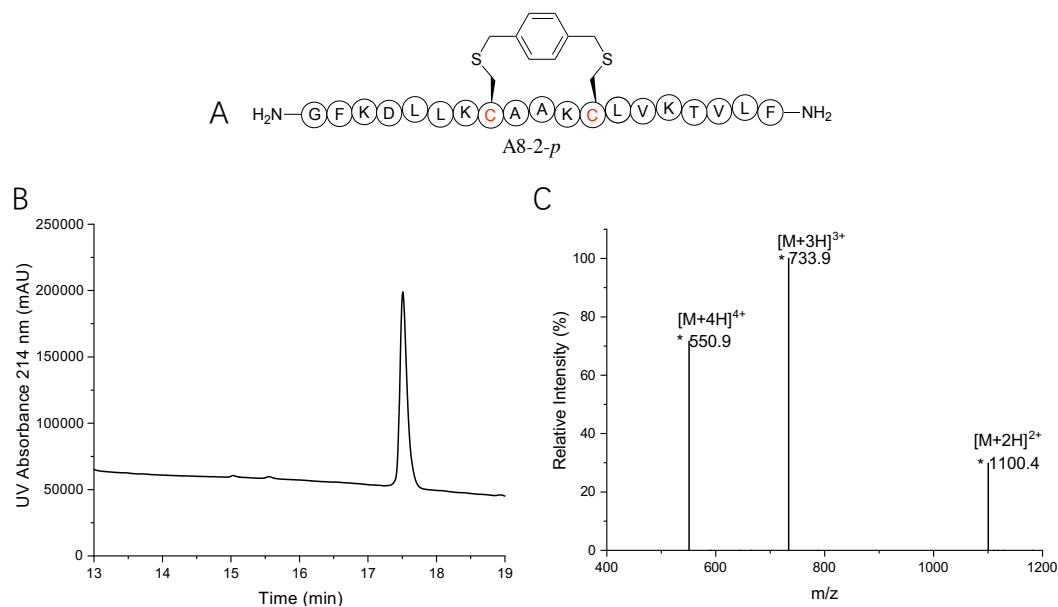

Supplementary Figure 7. A) The structure A8-2-*p*; B) The HPLC of purified A8-2-*p*; C) MS spectrum of A8-2-*p* calculated for  $C_{106}H_{172}N_{24}O_{22}S_2$  2197.24; found  $[M+2H]^{2+}$ : 1100.4;  $[M+3H]^{3+}$ : 733.9;  $[M+4H]^{4+}$ : 550.9.

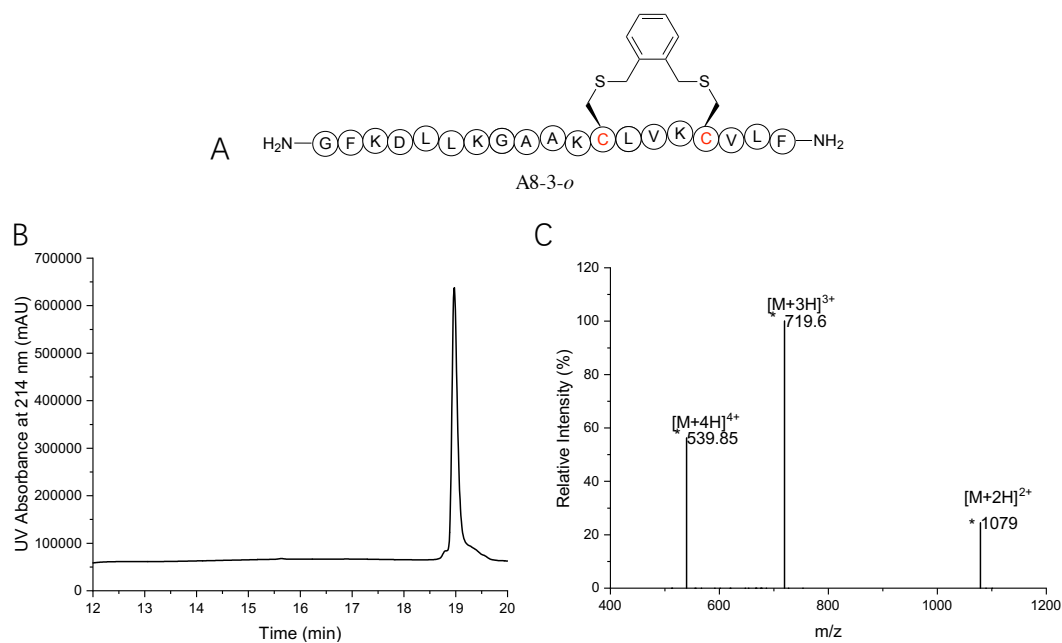

Supplementary Figure 8. A) The structure A8-3-*o*; B) The HPLC of purified A8-3-*o*; C) MS spectrum of A8-3-*o* calculated for  $C_{104}H_{167}N_{23}O_{22}S_2$  2154.2; found  $[M+2H]^{2+}$ : 1079;  $[M+3H]^{3+}$ : 719.6;  $[M+4H]^{4+}$ : 539.85.

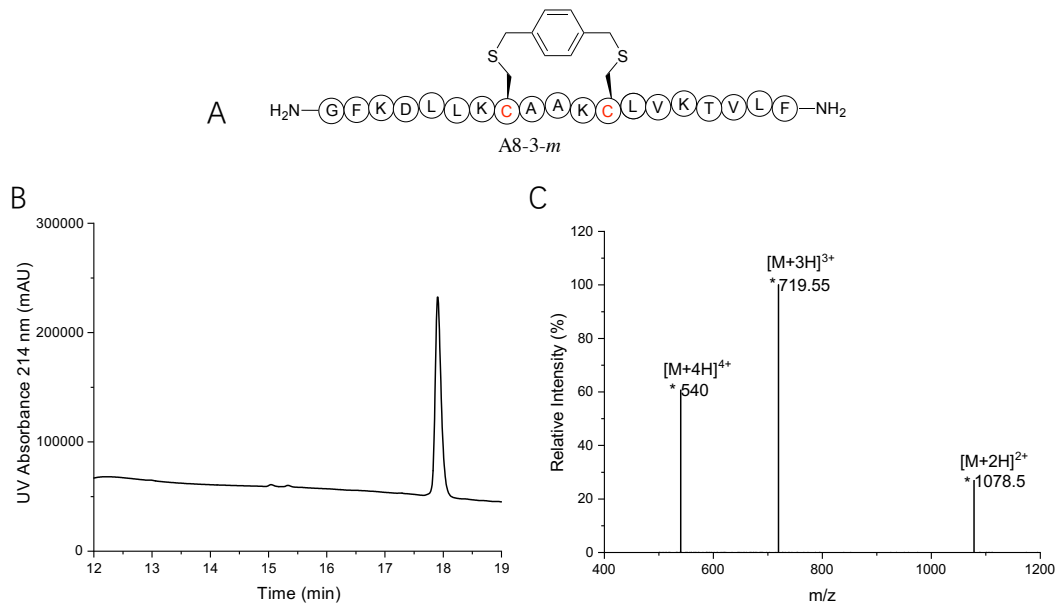

Supplementary Figure 9. A) The structure A8-3-*m*; B) The HPLC of purified A8-3-*m*; C) MS spectrum of A8-3-*m* calculated for C<sub>104</sub>H<sub>167</sub>N<sub>23</sub>O<sub>22</sub>S<sub>2</sub> 2154.2; found [M+2H]<sup>2+</sup>: 1078.75; [M+3H]<sup>3+</sup>: 719.55; [M+4H]<sup>4+</sup>: 540.

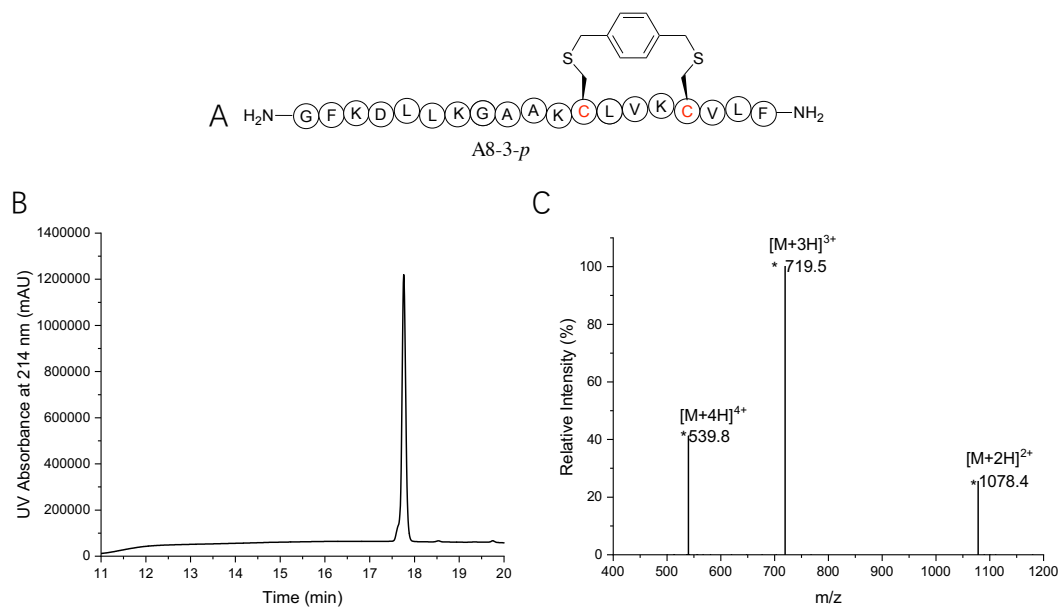

Supplementary Figure 10. A) The structure A8-3-*p*; B) The HPLC of purified A8-3-*p*; C) MS spectrum of A8-3-*p* calculated for C<sub>104</sub>H<sub>167</sub>N<sub>23</sub>O<sub>22</sub>S<sub>2</sub> 2154.2; found [M+2H]<sup>2+</sup>: 1078.4; [M+3H]<sup>3+</sup>: 719.5; [M+4H]<sup>4+</sup>: 539.8.

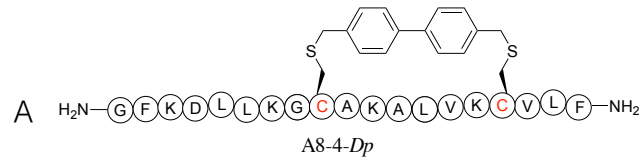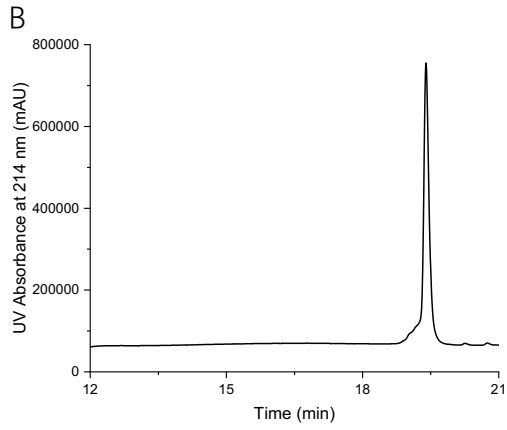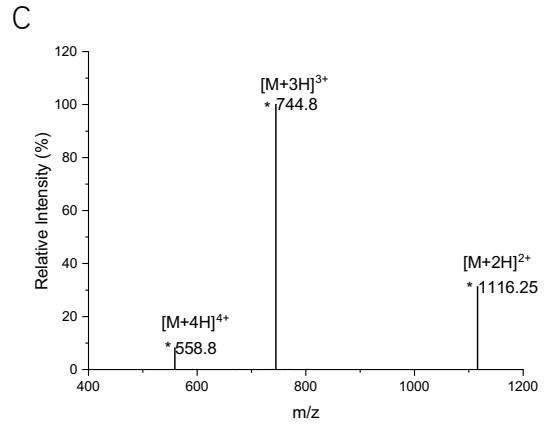

Supplementary Figure 11. A) The structure A8-4-Dp; B) The HPLC of purified A8-4-Dp; C) MS spectrum of A8-4-Dp calculated for C<sub>110</sub>H<sub>171</sub>N<sub>23</sub>O<sub>22</sub>S<sub>2</sub> 2230.24; found [M+2H]<sup>2+</sup>: 1116.25; [M+3H]<sup>3+</sup>: 744.8; [M+4H]<sup>4+</sup>: 558.8.
